# Supplementary material for: South Atlantic paleobathymetry since early Cretaceous
Source: PubMed Central journal article supplement (PMC5603583; doi:10.1038/s41598-017-11959-7), 2017-09-18
Supplement: 41598_2017_11959_MOESM1_ESM.pdf [file 41598_2017_11959_MOESM1_ESM.pdf]

# South Atlantic paleobathymetry since early Cretaceous

Lucía Pérez-Díaz and Graeme Eagles

## Supplementary Figures

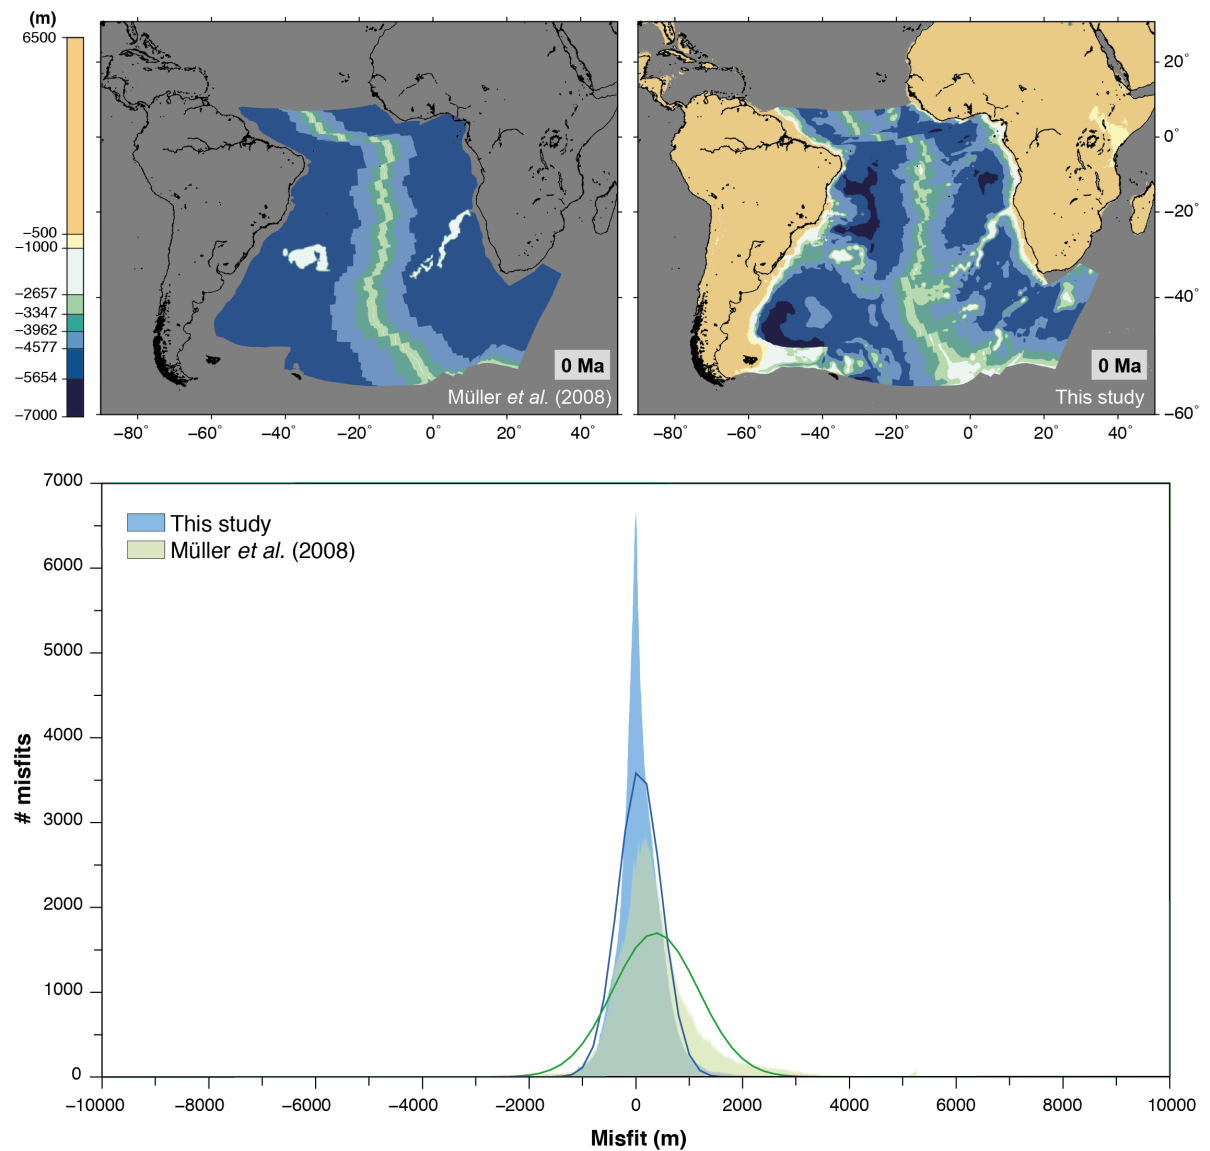

**FS01:** Top left panel: present day bathymetry as modelled by Müller et al (2008). Top right panel: present day bathymetry as modelled in this study. Bottom panel: Misfits between the two present-day modelled bathymetries and satellite-derived present-day bathymetry. The maps in this figure were generated using the Generic Mapping Tools (Wessel, P. et al. 2013).

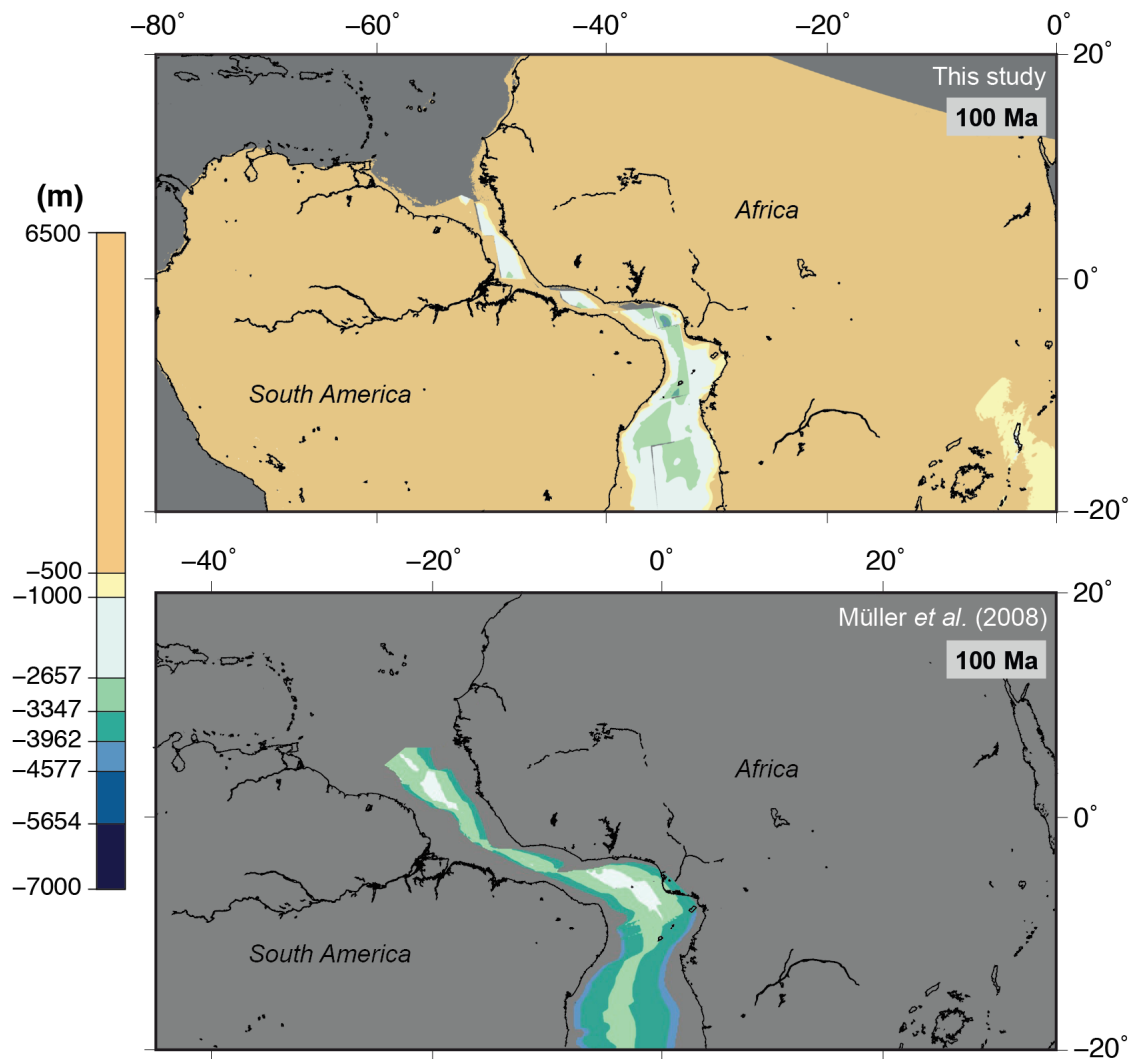

**FS02:** Differences between modelled paleobathymetry at 100 Ma following our approach (top panel) and that of Müller et al. (2008) (bottom panel). The maps in this figure were generated using the Generic Mapping Tools (Wessel, P. et al. 2013).
